# Supplementary material for: Dual-purpose resveratrol-quantum dots loaded albumin nanoparticles
Source: Royal Society of Chemistry journal article supplement (doi:10.1039/d4pm00100a), 2024-01-01
Supplement: d4pm00100a1.pdf [file d4pm00100a1.pdf]

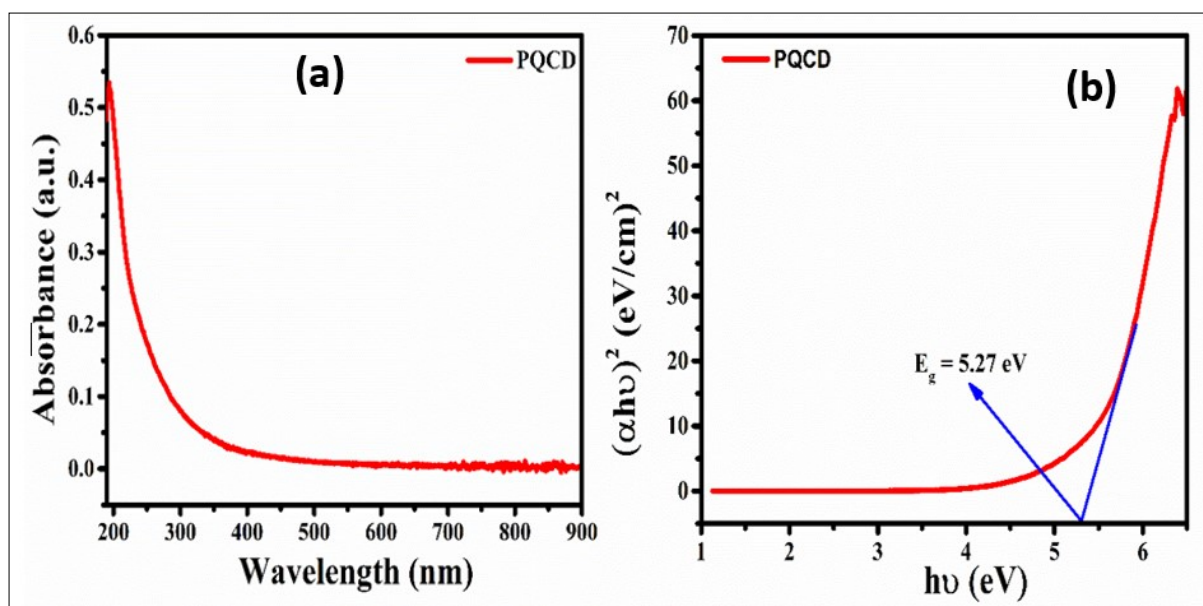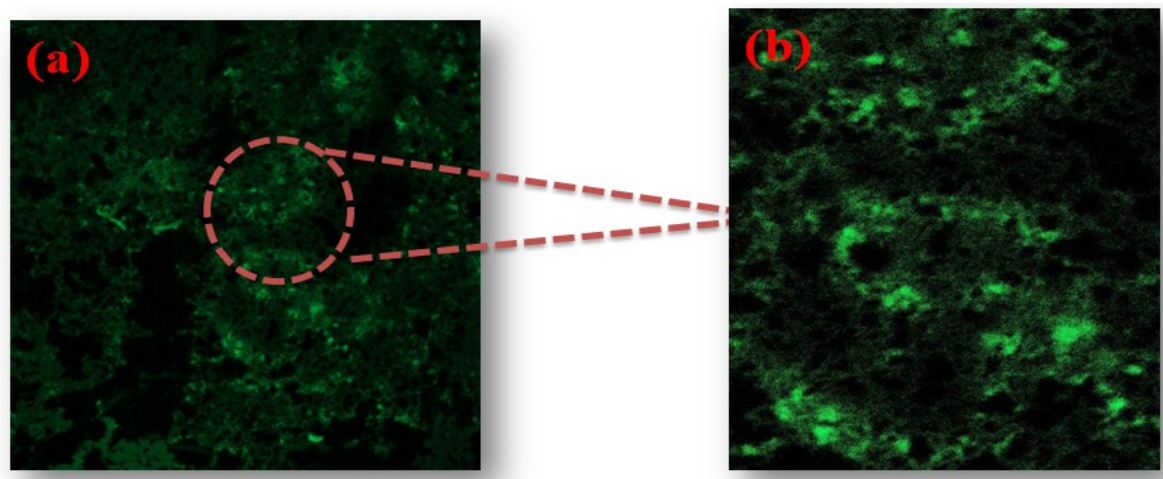

Figure S2. (a) Confocal microscope image (b) Enlarged aerial view.

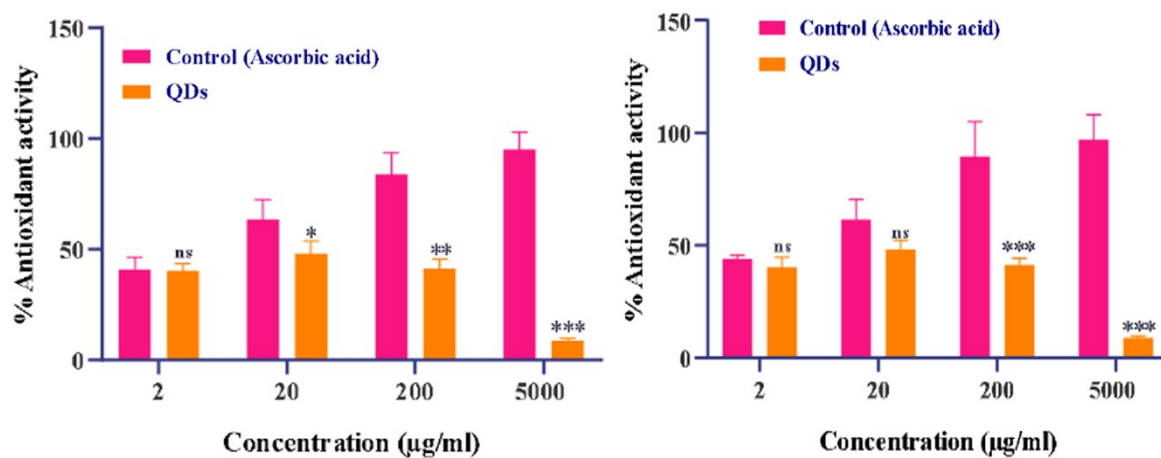

**Figure S3. (a) H<sub>2</sub>O<sub>2</sub> scavenging activity of PCQDs and (b) DPPH scavenging activity of PCQDs**

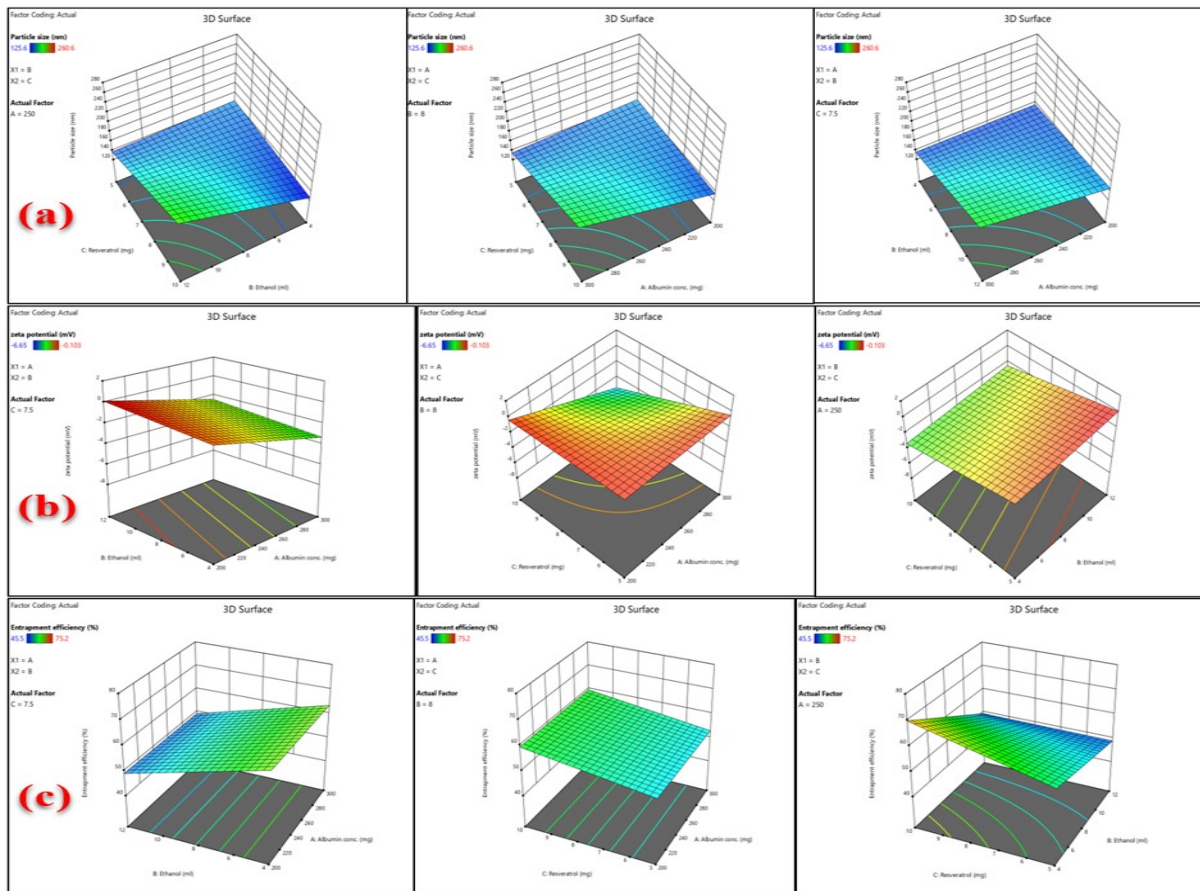

**Figure S4. (a) Surface-response curve for Particle size (b) Surface-response curve for zeta potential (c) Surface-response curve for entrapment efficiency.**

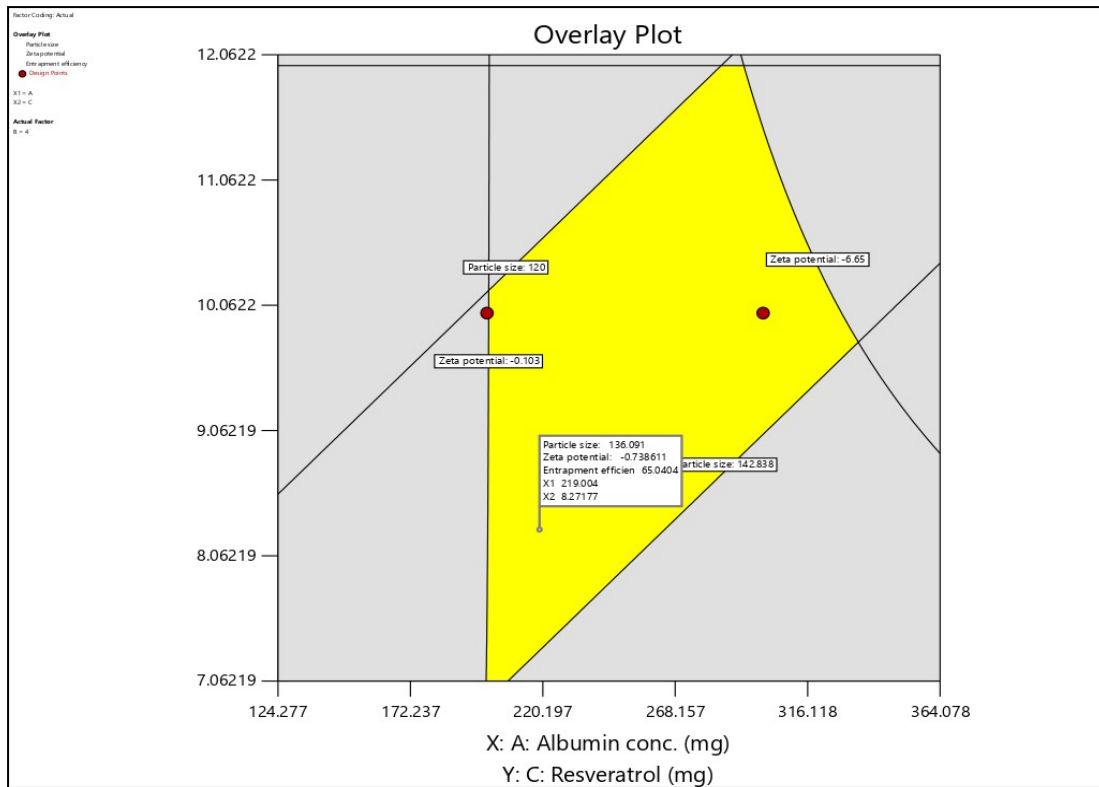

**Figure S5.** Overlay plot for albumin nanoparticles

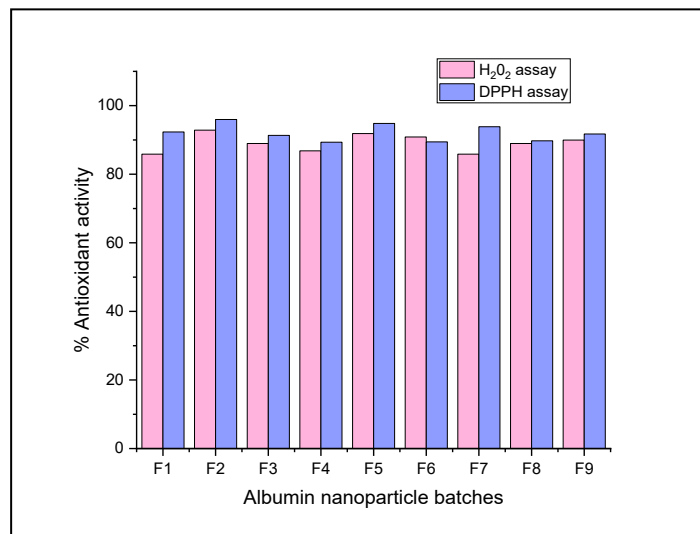

**Figure S6.** Antioxidant assay of Albumin nanoparticle batches

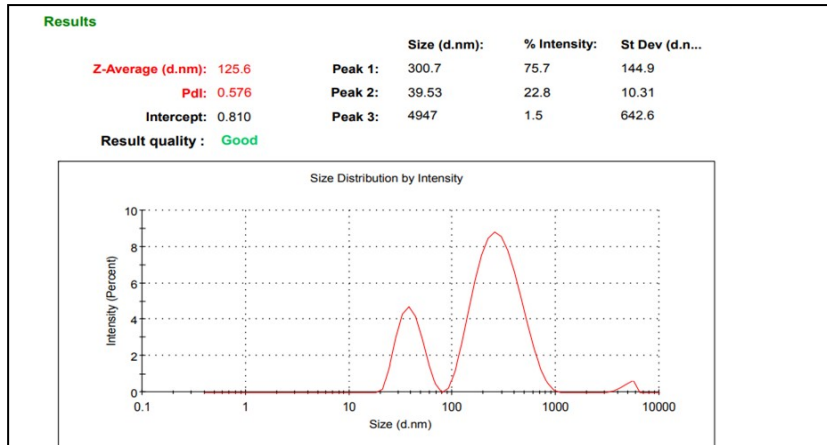

**Figure S7.** Particle size of optimized formulation

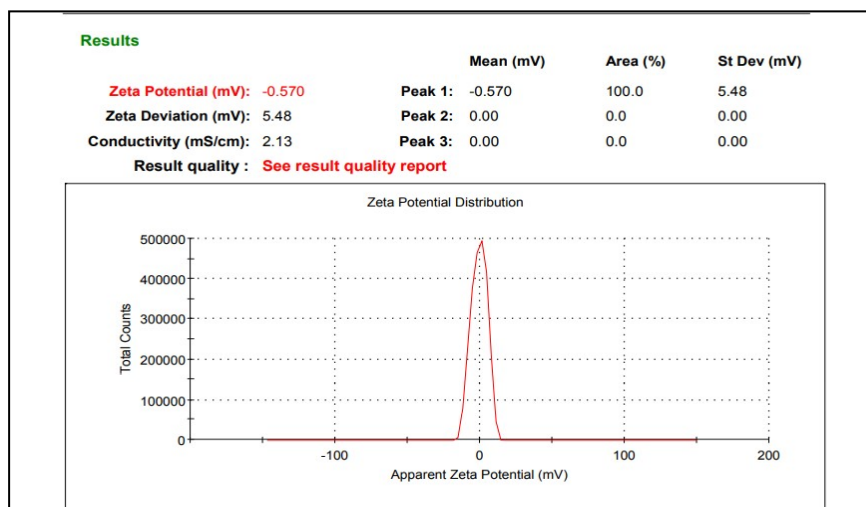

**Figure S8.** Zeta potential of optimized formulation

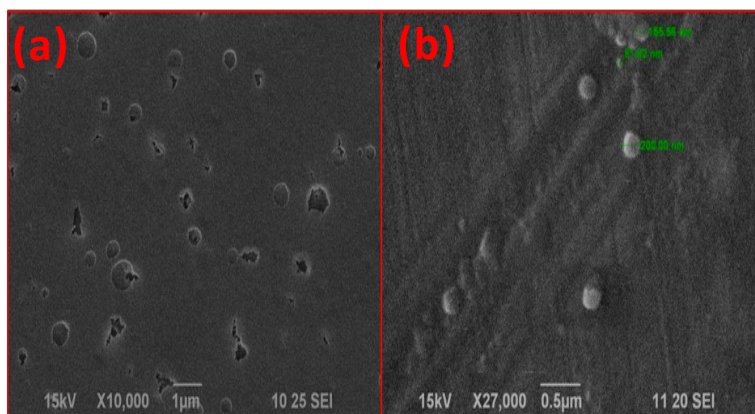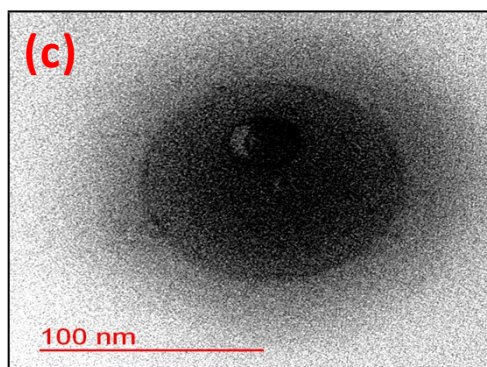

**Figure S9.** (a) SEM of Albumin nanoparticle without the drug (b) SEM of optimized formulation (c) TEM of optimized formulation

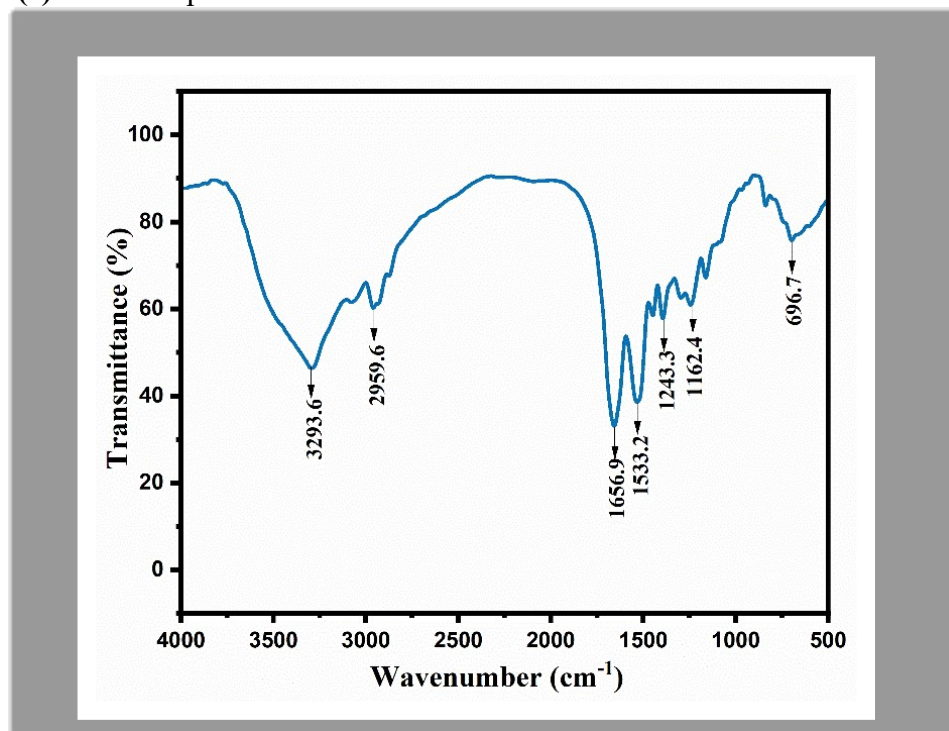

**Figure S10.** FTIR of optimized formulation

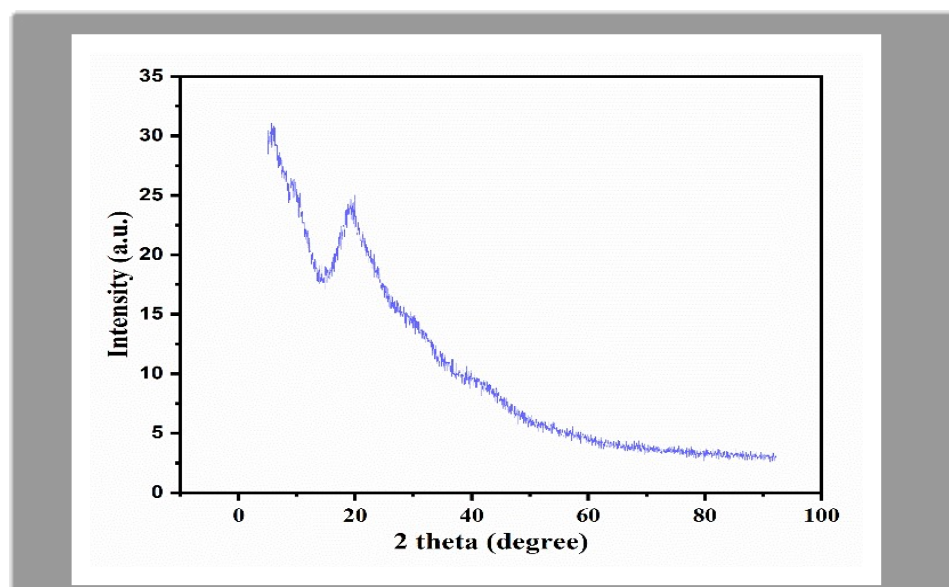

**Figure S11.** XRD of optimized formulation
